# Supplementary material for: FANCD2 modulates the mitochondrial stress response to prevent common fragile site instability
Source: PubMed Central journal article supplement (PMC7846573; doi:10.1038/s42003-021-01647-8), 2021-01-29
Supplement: 42003_2021_1647_MOESM3_ESM.pdf [file 42003_2021_1647_MOESM3_ESM.pdf]

## **Description of Additional Supplementary Files**

**File name:** Supplementary Data 1

**Description:** Source data underlying the graphs presented in the article Figures as Supplementary Data 1.
